# Supplementary material for: Syk-dependent tyrosine phosphorylation of 3BP2 is required for optimal FcRγ-mediated phagocytosis and chemokine expression in U937 cells
Source: PubMed Central journal article supplement (PMC5597638; doi:10.1038/s41598-017-11915-5), 2017-09-13
Supplement: 41598_2017_11915_MOESM1_ESM.pdf [file 41598_2017_11915_MOESM1_ESM.pdf]

## **Supplementary information**

**The title of the manuscript:** Syk-dependent tyrosine phosphorylation of 3BP2 is required for optimal FcR $\gamma$ -mediated phagocytosis and chemokine expression in U937 cells

**The author list:** Kazuyasu Chihara, Yuji Kato, Hatsumi Yoshiki, Kenji Takeuchi, Shigeharu Fujieda, Kiyonao Sada

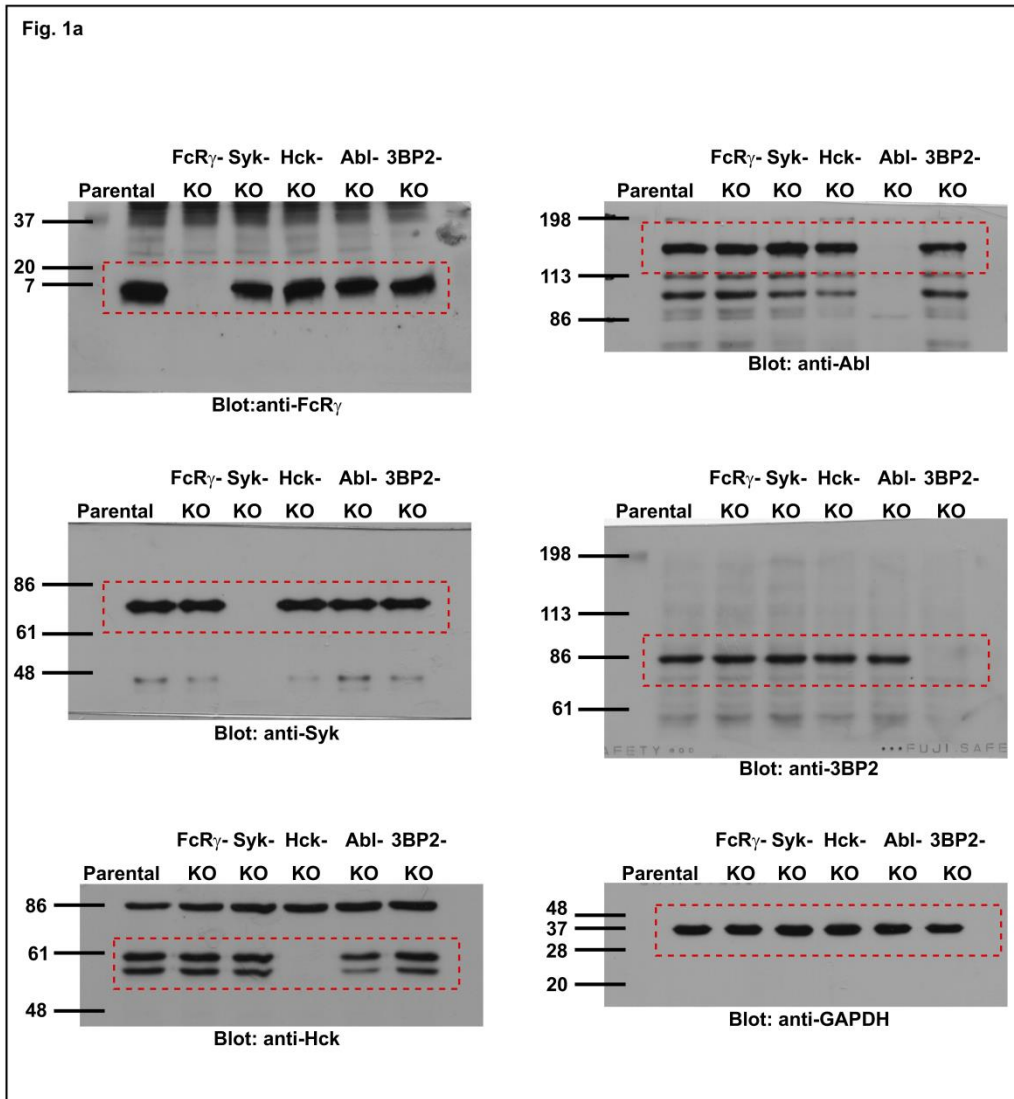

**Supplementary Figure S1**

Full-length images of immunoblots presented in the main figures

Fig. 1c

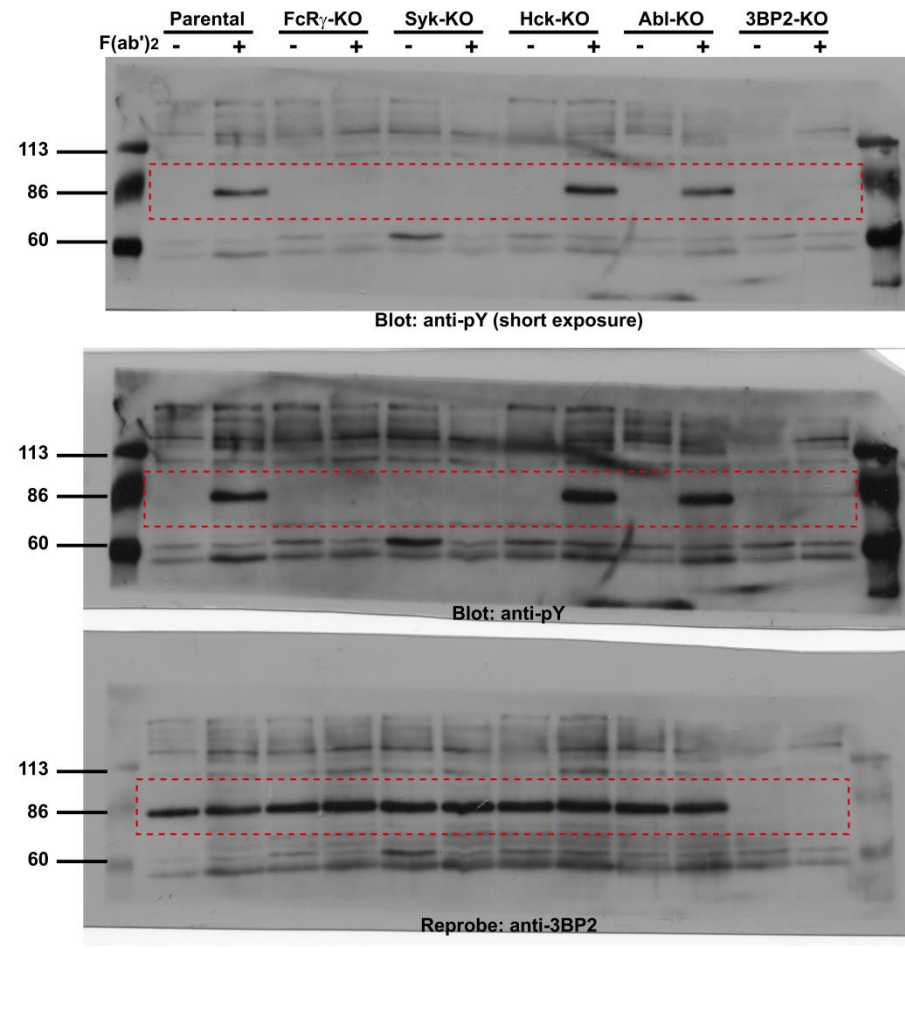

### Supplementary Figure S1

Full-length images of immunoblots presented in the main figures

Fig. 3a left panel

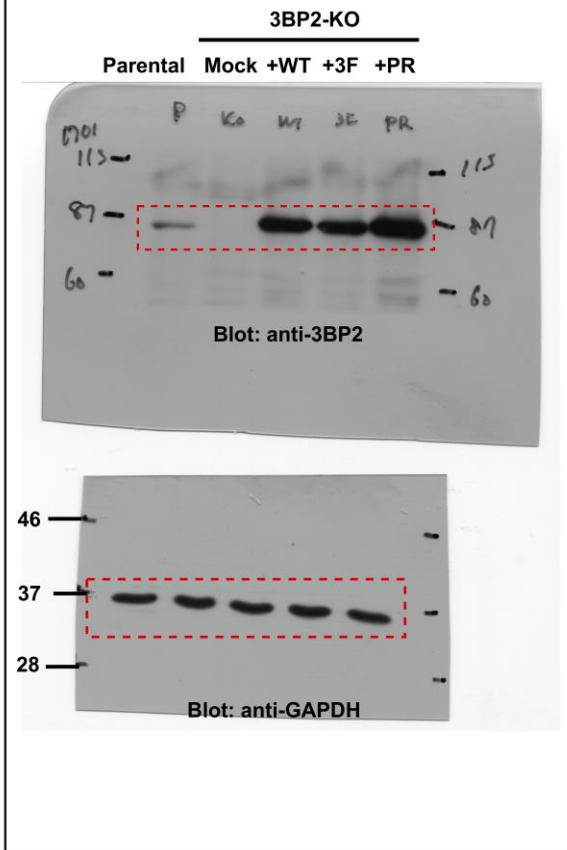

Fig. 3a right panel

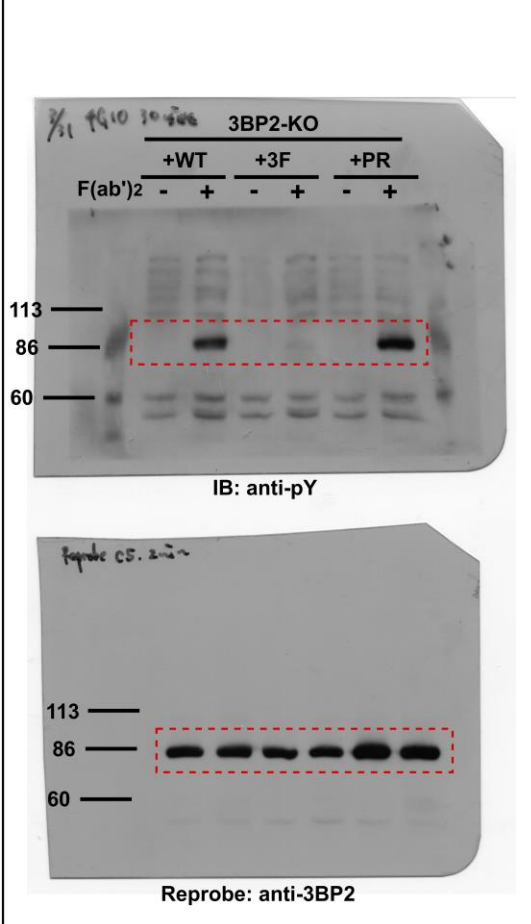

### Supplementary Figure S1

Full-length images of immunoblots presented in the main figures

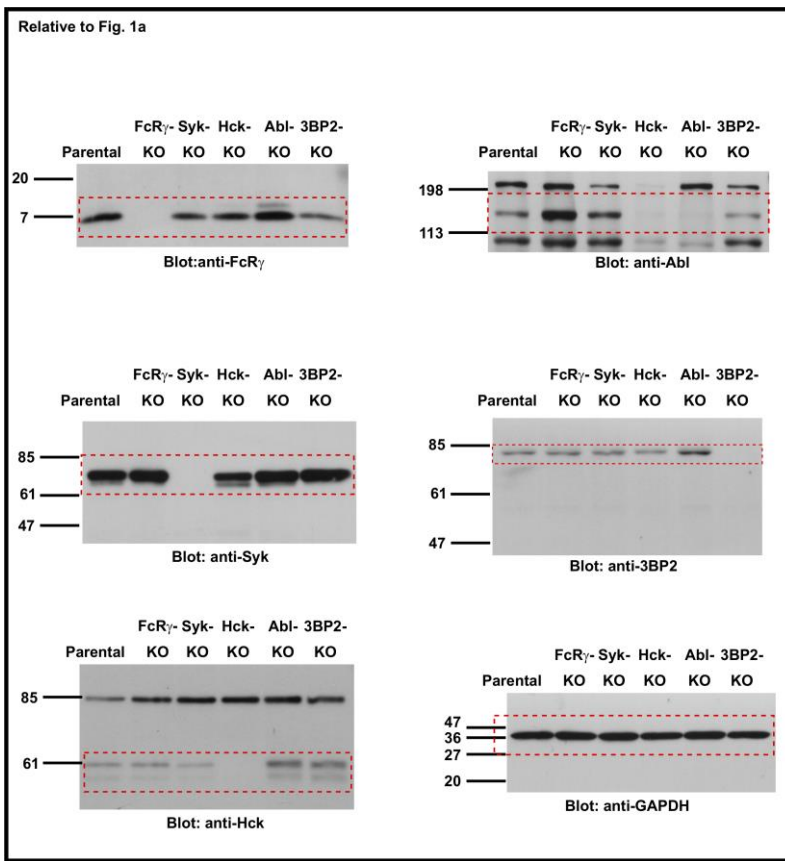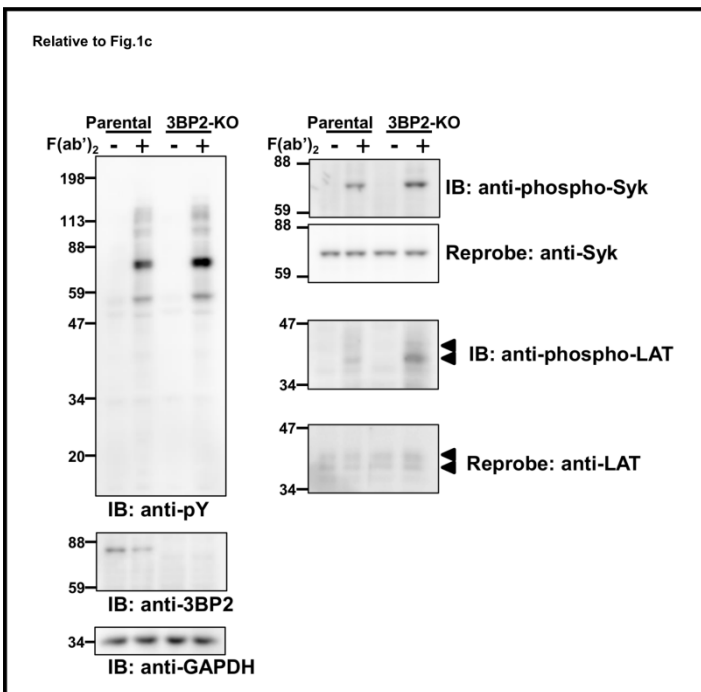

## Supplementary Figure S2

Similar results obtained from the other clones

Relative to Fig. 2a and c

a)

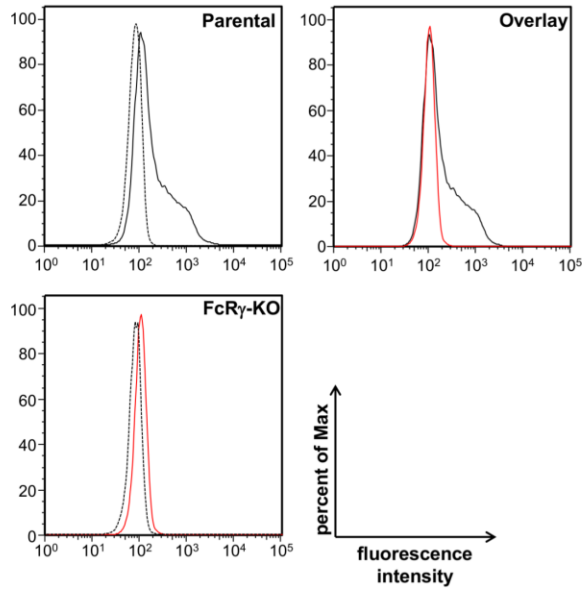

c)

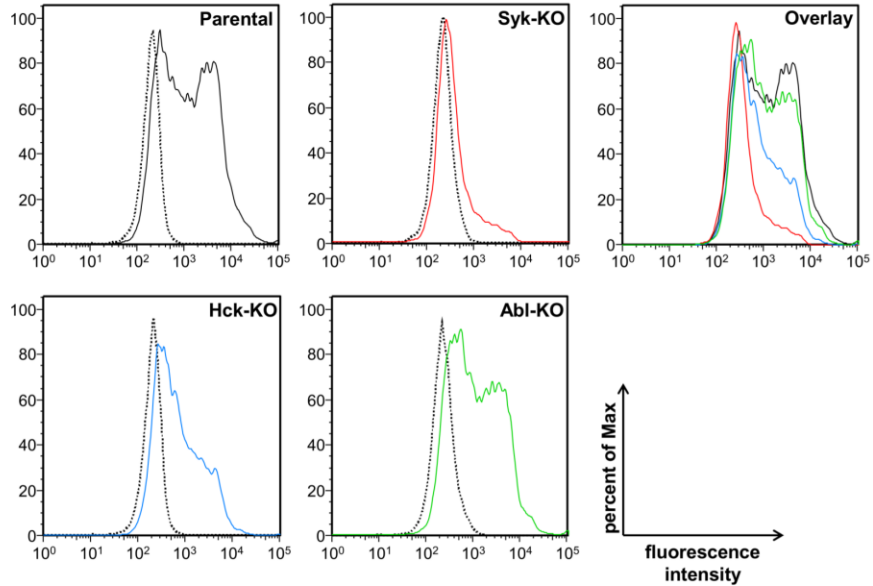

### Supplementary Figure S2

Similar results obtained from the other clones

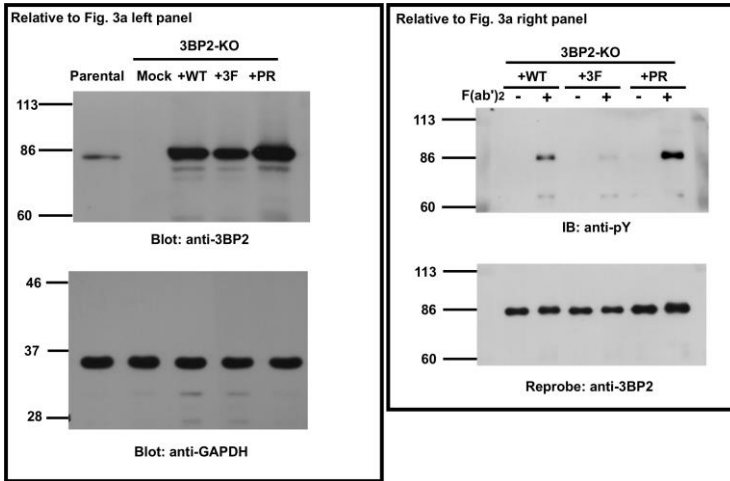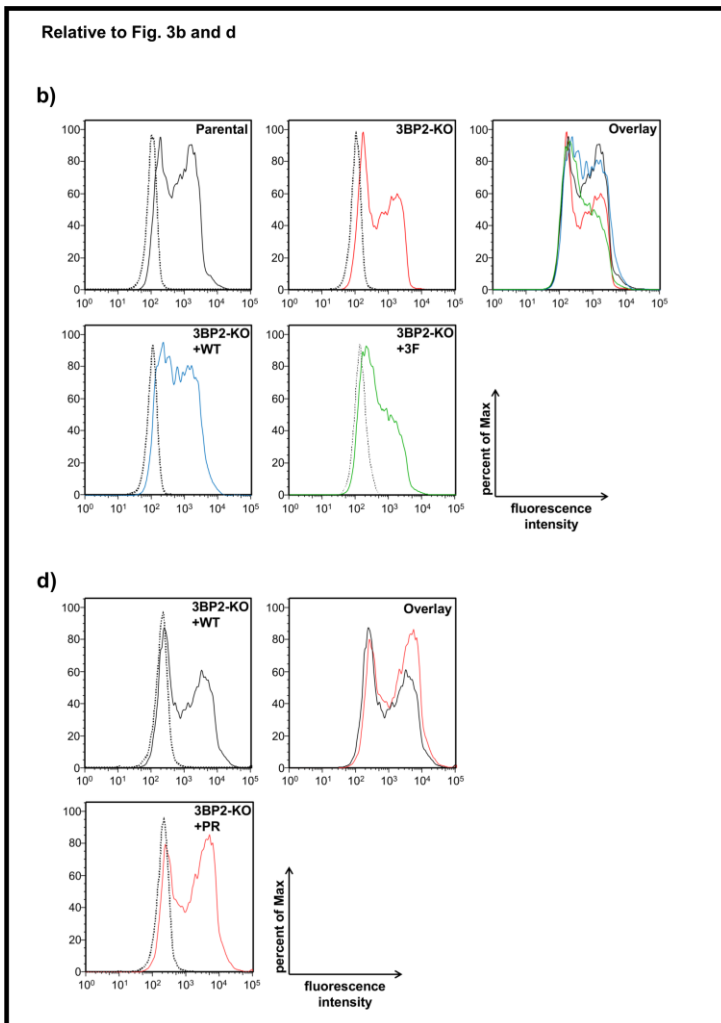

### Supplementary Figure S2

Similar results obtained from the other clones

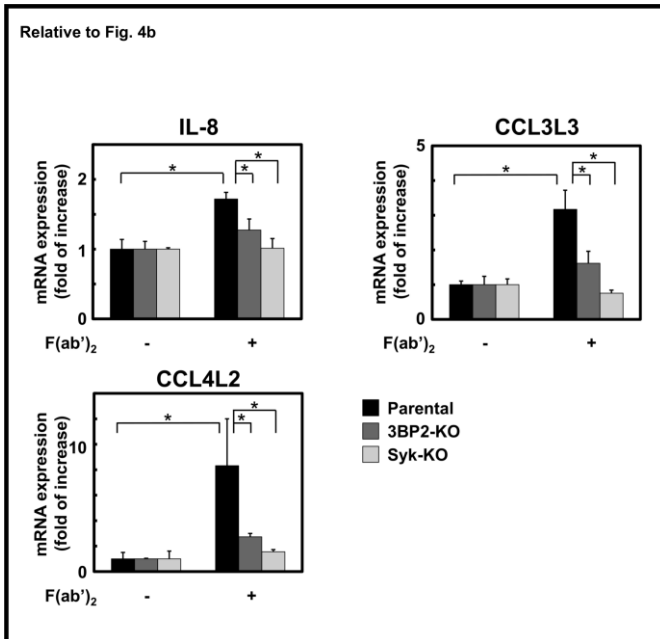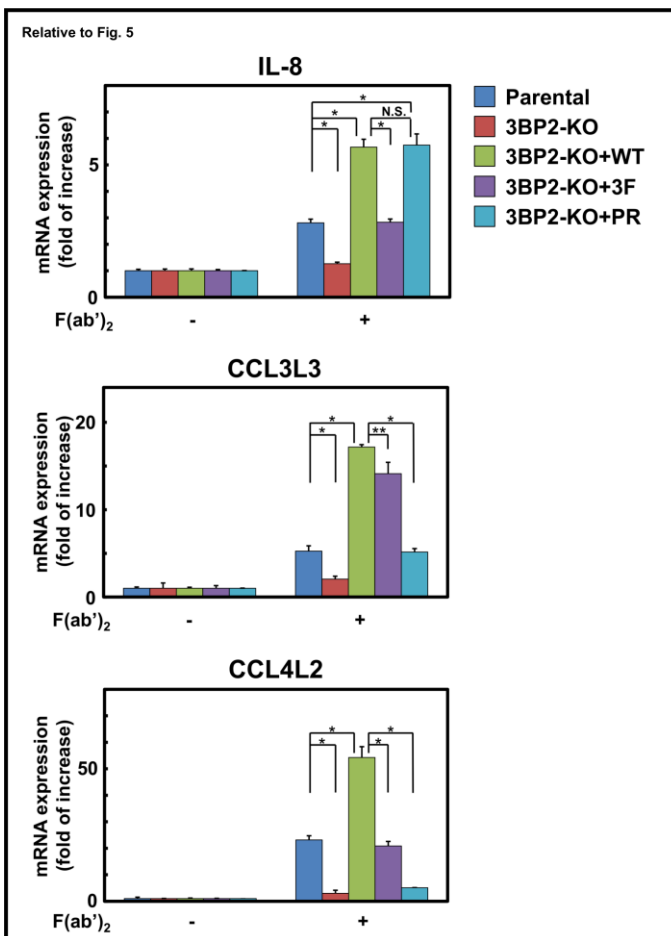

### Supplementary Figure S2

Similar results obtained from the other clones



### Supplementary Figure S3

#### Supplementary Materials

Peptide binding experiment was performed as described (Shukla *et al. J. Biol. Chem.*, 2009). In brief, biotinylated peptides corresponding to residues between 166 to 182, 177 to 193 or 438 to 453 of mouse 3BP2 were synthesized (3BP2-peptide Tyr174, 183 and 446 respectively). Peptides containing phosphorylated tyrosine residue corresponding to Tyr174, 183 or 446 of mouse 3BP2 were also synthesized (3BP2 peptide P-Tyr174, 183 and 446 respectively). U937 cell lysates were reacted with these peptides prebound to streptavidin beads. Interaction of the peptides with PLC $\gamma$ 2 and Vav1 were analyzed by immunoblotting. Anti-PLC $\gamma$ 2 and anti-Vav1 antibodies were obtained from Santa Cruz Biotechnology.

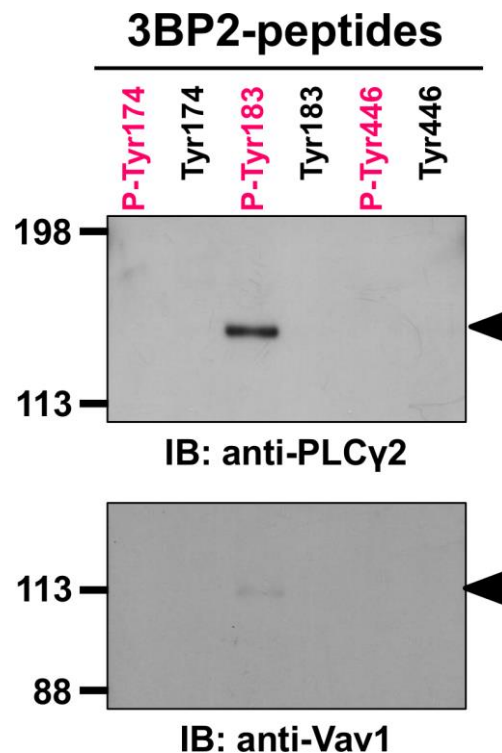

#### Supplementary Figure S3. Interaction of 3BP2 with PLC $\gamma$ 2 and Vav1.

U937 cell lysates were reacted with the indicated peptides prebound to streptavidin beads. Interaction of the peptides with PLC $\gamma$ 2 and Vav1 were analyzed by immunoblotting. Molecular size markers are indicated on the left in kDa. Data are representative of three independent experiments. Arrowheads indicate the position of PLC $\gamma$ 2 (upper panel) or Vav1 (lower panel).

### Supplementary Table S1

Oligo DNA pairs to generate the single-guide RNA for the indicated genes

**FcR $\gamma$** : 5' -CACCGAGTAAGAGCAAGACCACTGC-3'  
3' -CTCATTCTCGTTCTGGTGACGCAAA-5'

**Syk**: 5' -CACCGTTTCGGCAACATCACCCGGG-3'  
3' -CAAAGCCGTTGTAGTGGGCCCCAAA-5'

**Hck**: 5' -CACCGTGGGATCCGGCACGTACAC-3'  
3' -CACCTAGGCCGTGCATGTGCAAA-5'

**Abl**: 5' -CACCGTCTGAGTGAAGCCGCTCGT-3'  
3' -CAGACTCACTTCGGCGAGCACAAA-5'

**3BP2**: 5' -CACCGGGTACCGCCCTTCTTGTGC-3'  
3' -CCCATGGCGGGAAGAACACGCAAA-5'

### Supplementary Table S2

Calculated fold changes of Fc $\gamma$ RI-induced genes in the indicated cell lines

| Affymetrix Human Gene 2.0 ST array | Cell type →<br>F(ab') <sub>2</sub> →<br>Gene Symbol | Parental           |          | 3BP2-KO            |           | Syk-KO             |           |
|------------------------------------|-----------------------------------------------------|--------------------|----------|--------------------|-----------|--------------------|-----------|
|                                    |                                                     | -                  | +        | -                  | +         | -                  | +         |
| Probe set ID                       | Gene Symbol                                         | Log2 (fold change) |          | Log2 (fold change) |           | Log2 (fold change) |           |
| 16934764                           | <i>ELFN2</i>                                        | -0.801667          | 0.248333 | 0.308333           | -0.081666 | 0.298333           | 0.028333  |
| 17049237                           | <i>STAG3</i>                                        | -0.926667          | 0.213333 | 0.083333           | 0.143333  | -0.076667          | 0.563334  |
| 16723653                           | <i>CD44</i>                                         | 0.110000           | 1.390000 | 0.250000           | -0.020000 | -1.700000          | -0.030000 |
| 16989736                           | <i>EGR1</i>                                         | -0.683333          | 1.006666 | -0.463333          | 0.686667  | -0.313333          | -0.233333 |
| 17075395                           | <i>EGR3</i>                                         | -0.281667          | 1.338333 | -0.531667          | 0.498333  | -0.401667          | -0.621667 |
| 16833426                           | <i>CCL4L2</i>                                       | -0.298333          | 0.741667 | -0.308333          | 0.201667  | -0.098333          | -0.238333 |
| 16761201                           | <i>CD69</i>                                         | -0.551667          | 0.718333 | -0.121666          | 0.338334  | -0.451667          | 0.068333  |
| 16689869                           | <i>F3</i>                                           | 0.131667           | 1.461667 | -0.368333          | 0.291667  | -0.948333          | -0.568334 |
| 17035418                           | <i>TNF</i>                                          | 0.438333           | 1.798334 | -0.291667          | -0.011667 | -0.961667          | -0.971667 |
| 16967771                           | <i>IL8</i>                                          | -0.040000          | 2.700000 | -0.330000          | 1.340000  | -1.660000          | -2.010000 |
| 17031687                           | <i>IER3</i>                                         | 0.335000           | 1.395000 | 0.085000           | 0.635000  | -1.115000          | -1.335000 |
| 16843602                           | <i>CCL3L3</i>                                       | -0.233333          | 1.226667 | -0.093333          | 0.076667  | -0.303333          | -0.673333 |
| 16901986                           | <i>IL1B</i>                                         | -0.113333          | 0.936667 | -0.293333          | -0.203333 | -0.123333          | -0.203333 |
